# Supplementary material for: Food Addiction Support: Website Content Analysis
Source: PubMed Central journal article supplement (PMC6834215; doi:10.2196/cardio.8718), 2018-04-24
Supplement: cardio_v2i1e10_app1.pdf [file cardio_v2i1e10_app1.pdf]

## Multimedia Appendix 1

### Summary of search results by search engine

| <b>Search Term</b>              | <b>Google</b> | <b>Met inclusion criteria</b> | <b>Bing</b> | <b>Met inclusion criteria</b> | <b>Yahoo</b> | <b>Met inclusion criteria</b> | <b>DuckDuckGo</b> | <b>Met inclusion criteria</b> |
|---------------------------------|---------------|-------------------------------|-------------|-------------------------------|--------------|-------------------------------|-------------------|-------------------------------|
| <b>Food Addiction treatment</b> | 10,200,000    | 3                             | 4,730,000   | 3                             | 10,600,000   | 3                             | 128               | 4                             |
| <b>Food Addiction help</b>      | 11,900,000    | 4                             | 1,210,000   | 3                             | 22,400,000   | 4                             | 128               | 7                             |
| <b>Food Addiction groups</b>    | 8,670,000     | 10                            | 7,620,000   | 7                             | 5,110,000    | 8                             | 128               | 6                             |
| <b>Food Addiction recovery</b>  | 8,680,000     | 10                            | 847,000     | 7                             | 4,990,000    | 9                             | 128               | 9                             |
