# Supplementary material for: Food Addiction Support: Website Content Analysis
Source: PubMed Central journal article supplement (PMC6834215; doi:10.2196/cardio.8718), 2018-04-24
Supplement: cardio_v2i1e10_app2.pdf [file cardio_v2i1e10_app2.pdf]

Multimedia Appendix 2

Food Addiction Website Criteria Extraction

**Website:**

| Criteria                                                                                                                   | Yes | No |
|----------------------------------------------------------------------------------------------------------------------------|-----|----|
| Is there a fee to be involved in the intervention/program?                                                                 |     |    |
| Does the program follow a specific philosophy?<br>If yes, describe (eg, 12 steps_____)                                     |     |    |
| Are participants of the intervention/program required to follow specific meal plans?                                       |     |    |
| Are the participants of the intervention/program required to abstain from eating particular foods eg, sugar, wheat, starch |     |    |
| Is there a peer sponsorship element involved with the program?                                                             |     |    |
| Does the program have a large spirituality component?                                                                      |     |    |
| Does the intervention/program offer face-to-face meetings or sessions?                                                     |     |    |
| Does the intervention/program offer phone meetings or sessions?                                                            |     |    |
| Does the intervention/program offer online meetings or sessions?                                                           |     |    |
| Does the intervention/program offer online podcasts to participants?                                                       |     |    |
| Does the intervention/program offer delivery of a regular information newsletter to participants?                          |     |    |
| Does the intervention/program have a closed Facebook/social media group for participants to join?                          |     |    |
| Does the intervention/program offer intensive                                                                              |     |    |

|                                                        |  |  |
|--------------------------------------------------------|--|--|
| retreat programs for participants?                     |  |  |
| What country did the intervention originate from?      |  |  |
| What year did the intervention originate?              |  |  |
| What are the member numbers for the intervention?      |  |  |
| Are health professionals involved in the intervention? |  |  |
| Has the intervention been evaluated?                   |  |  |
