# Supplementary material for: Food Addiction Support: Website Content Analysis
Source: PubMed Central journal article supplement (PMC6834215; doi:10.2196/cardio.8718), 2018-04-24
Supplement: cardio_v2i1e10_app3.pdf [file cardio_v2i1e10_app3.pdf]

## Multimedia Appendix 3

Included Websites – Accessed April 2017

| Website                                  | URL                                                                                                                                                                                                                            |
|------------------------------------------|--------------------------------------------------------------------------------------------------------------------------------------------------------------------------------------------------------------------------------|
| Overeaters Anonymous                     | <a href="https://oa.org">https://oa.org</a> (Archived by WebCite <sup>®</sup> at <a href="http://www.webcitation.org/6sBcaQAhe">http://www.webcitation.org/6sBcaQAhe</a> )                                                     |
| Food Addicts Anonymous                   | <a href="https://foodaddictsanonymous.org">https://foodaddictsanonymous.org</a> (Archived by WebCite <sup>®</sup> at <a href="http://www.webcitation.org/6sBdBhtPX">http://www.webcitation.org/6sBdBhtPX</a> )                 |
| Grey Sheeters Anonymous                  | <a href="http://www.greysheet.org">www.greysheet.org</a> (Archived by WebCite <sup>®</sup> at <a href="http://www.webcitation.org/6sBdRP5lq">http://www.webcitation.org/6sBdRP5lq</a> )                                        |
| Recovery From Food Addiction Inc.        | <a href="http://www.recoveryfromfoodaddiction.org">http://www.recoveryfromfoodaddiction.org</a> (Archived by WebCite <sup>®</sup> at <a href="http://www.webcitation.org/6sBdV28Hz">http://www.webcitation.org/6sBdV28Hz</a> ) |
| Compulsive Eaters Anonymous – HOW        | <a href="https://www.ceahow.org">https://www.ceahow.org</a> (Archived by WebCite <sup>®</sup> at <a href="http://www.webcitation.org/6sBdY0M0M">http://www.webcitation.org/6sBdY0M0M</a> )                                     |
| Food Compulsions Anonymous               | <a href="https://foodcompulsions.wordpress.com">https://foodcompulsions.wordpress.com</a> (Archived by WebCite <sup>®</sup> at <a href="http://www.webcitation.org/6sBdd1oMO">http://www.webcitation.org/6sBdd1oMO</a> )       |
| ACORN – Food Addiction Recovery Services | <a href="https://www.foodaddiction.com">https://www.foodaddiction.com</a> (Archived by WebCite <sup>®</sup> at <a href="http://www.webcitation.org/6sBdg5Evb">http://www.webcitation.org/6sBdg5Evb</a> )                       |
| Full of Faith                            | <a href="http://fulloffaith.com">http://fulloffaith.com</a> (Archived by WebCite <sup>®</sup> at <a href="http://www.webcitation.org/6sBdi8p2U">http://www.webcitation.org/6sBdi8p2U</a> )                                     |
| Christian Food Addicts                   | <a href="https://christianfoodaddicts.weebly.com">https://christianfoodaddicts.weebly.com</a> (Archived by WebCite <sup>®</sup> at <a href="http://www.webcitation.org/6sBdnbEVO">http://www.webcitation.org/6sBdnbEVO</a> )   |
| Kay Sheppard                             | <a href="https://kaysheppard.com">https://kaysheppard.com</a> (Archived by WebCite <sup>®</sup> at <a href="http://www.webcitation.org/6sBdtCgqH">http://www.webcitation.org/6sBdtCgqH</a> )                                   |
| Food Addiction Intensive                 | <a href="http://www.foodaddictionintensive.com">http://www.foodaddictionintensive.com</a> (Archived by WebCite <sup>®</sup> at <a href="http://www.webcitation.org/6sBdyVwLZ">http://www.webcitation.org/6sBdyVwLZ</a> )       |
| COR Retreat                              | <a href="http://cormn.org">http://cormn.org</a> (Archived by WebCite <sup>®</sup> at <a href="http://www.webcitation.org/6sBe1lrWY">http://www.webcitation.org/6sBe1lrWY</a> )                                                 |
| Eating Sanity                            | <a href="http://eatingsanity.com">http://eatingsanity.com</a> (Archived by WebCite <sup>®</sup> at <a href="http://www.webcitation.org/6sBeHoGcW">http://www.webcitation.org/6sBeHoGcW</a> )                                   |
